# Supplementary material for: Rebalancing TGF‐β/Smad7 signaling via Compound kushen injection in hepatic stellate cells protects against liver fibrosis and hepatocarcinogenesis
Source: PubMed Central journal article supplement (PMC8255064; doi:10.1002/ctm2.410), 2021-07-04
Supplement: CTM2-11-e410-s001.pdf [file CTM2-11-e410-s001.pdf]

1 **Supplementary information**

2 **Rebalancing TGF- $\beta$ /Smad7 signaling via Compound kushen injection in hepatic**  
3 **stellate cells protects against liver fibrosis and hepatocarcinogenesis**

4 Yang Yang<sup>1,2#</sup>, Mayu Sun<sup>1,2#</sup>, Weida Li<sup>1#</sup>, Chaobao Liu<sup>1</sup>, Zheshun Jiang<sup>1</sup>, Pengfei Gu<sup>1</sup>,  
5 Jingquan Li<sup>1</sup>, Qian Ba<sup>1\*</sup>, Xiaoguang Li<sup>1\*</sup>, Hui Wang<sup>1,2,\*</sup>

6 <sup>1</sup>*State Key Laboratory of Oncogenes and Related Genes, Center for Single-Cell*  
7 *Omics, School of Public Health, Shanghai Jiao Tong University School of Medicine,*  
8 *Shanghai, China.*

9 <sup>2</sup>*CAS Key Laboratory of Nutrition, Metabolism and Food safety, Shanghai Institute of*  
10 *Nutrition and Health, University of Chinese Academy of Sciences, Chinese Academy*  
11 *of Sciences, Shanghai, China.*

12

13 **\*Correspondence:** huiwang@shsmu.edu.cn (H. Wang); lixg@shsmu.edu.cn (X. Li)  
14 and qba@shsmu.edu.cn (Q. Ba).

15

16 **#Yang Yang, Mayu Sun and Weida Li contributed equally to this work.**

17

18

19

20

21

22

## 23 **Supplementary methods**

24 The meta-analysis included in this study was performed in accordance with the  
25 Preferred Reporting Items for Systematic Reviews and Meta-Analyses (PRISMA)  
26 guidelines.

## 27 **Database and Search strategy**

28 The consulted electronic databases include PubMed, Web of Science, ClinicalTrials.  
29 gov, the China National Knowledge Infrastructure (CNKI), the Wanfang Database and  
30 the Cqvip Database. The last search date was April 10, 2021.

31 The search details were conducted with the terms “kushen injection” [Title/Abstract]  
32 OR “matrine injection” [Title/Abstract] OR “Sophora flavescens Injection”  
33 [Title/Abstract] AND “liver fibrosis” [Title/Abstract] OR “liver inflammation”  
34 [Title/Abstract] OR “HBV” [Title/Abstract] OR “HCV” [Title/Abstract] OR “NASH”  
35 [Title/Abstract] OR “liver cirrhosis” [Title/Abstract].

## 36 **Inclusion and Exclusion criteria**

37 Studies that met the following inclusion criteria were considered eligible for this meta-  
38 analysis: (1) trials were described as RCTs; (2) study patients were diagnosed as HBV,  
39 HCV or NASH induced chronic liver inflammation, fibrosis, or cirrhosis; (3) patients  
40 in the experimental group received CKI or CKI combined with regularly antiviral or  
41 liver fibrosis treatment agents, whereas patients in the control group only received  
42 antiviral or liver fibrosis treatment agents. (4) a minimum of two of the following  
43 outcomes were included in each study: ALT, AST, T-BIL, laminin (LN), hyaluronic acid  
44 (HA), procollagen type III (COL3) and collagen type IV (COL4).

45 The exclusion criteria were as follows: (1) the trials were not RCTs; (2) diagnostic  
46 criteria were not clearly reported in the trials; (3) relevant outcome indexes were not  
47 reported or estimated; (4) the detailed data regarding the liver functions were not  
48 available.

#### 49 **Data Extraction and Analysis**

50 All identified articles were retrieved in full and the following data were extracted,  
51 including (1) publication information: the name of the first author and the publication  
52 year; (2) characteristics of patients: number, gender, age, the duration of disease and  
53 etiology; (3) Information on the intervention: dosage, duration and treatment cycle; (4)  
54 outcomes: the measured data on the efficiency of treatments. The characteristics of all  
55 included RCTs are summarized in Supplementary Table 5.

56 All analyses were performed using R software. Continuous data were shown as the  
57 standardized mean difference (SMD) with a 95% confidence intervals (CI) and the  
58 studies were pooled with the inverse variance weighted method under the fixed model  
59 and DerSimonian and Laird random-effects model. Heterogeneity was assessed using  
60  $I^2$  and  $\tau^2$  statistics. Substantial heterogeneity was considered when  $I^2 > 50\%$  or  $P < 0.01$ .

61 The included trials publication bias was evaluated by Rank correlation test of funnel  
62 plot asymmetry.

63

64

65 **Supplementary Figures and Figure legends**

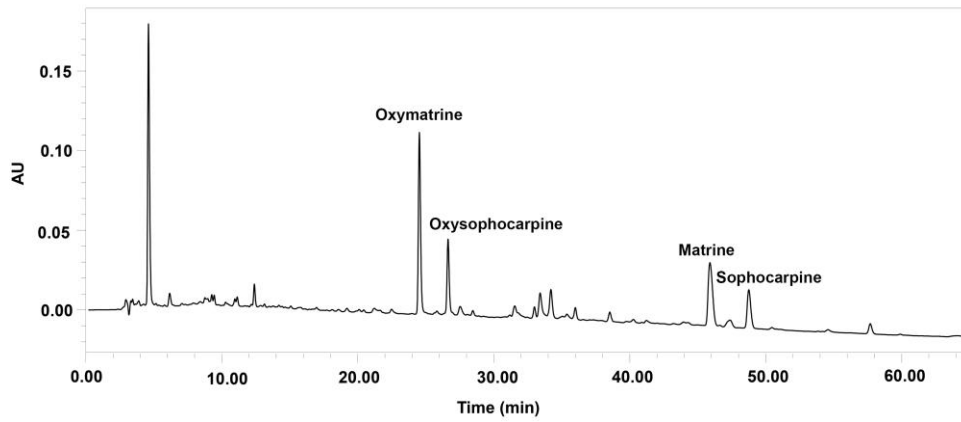

66

67 **Figure S1** The HPLC fingerprint of CKI.

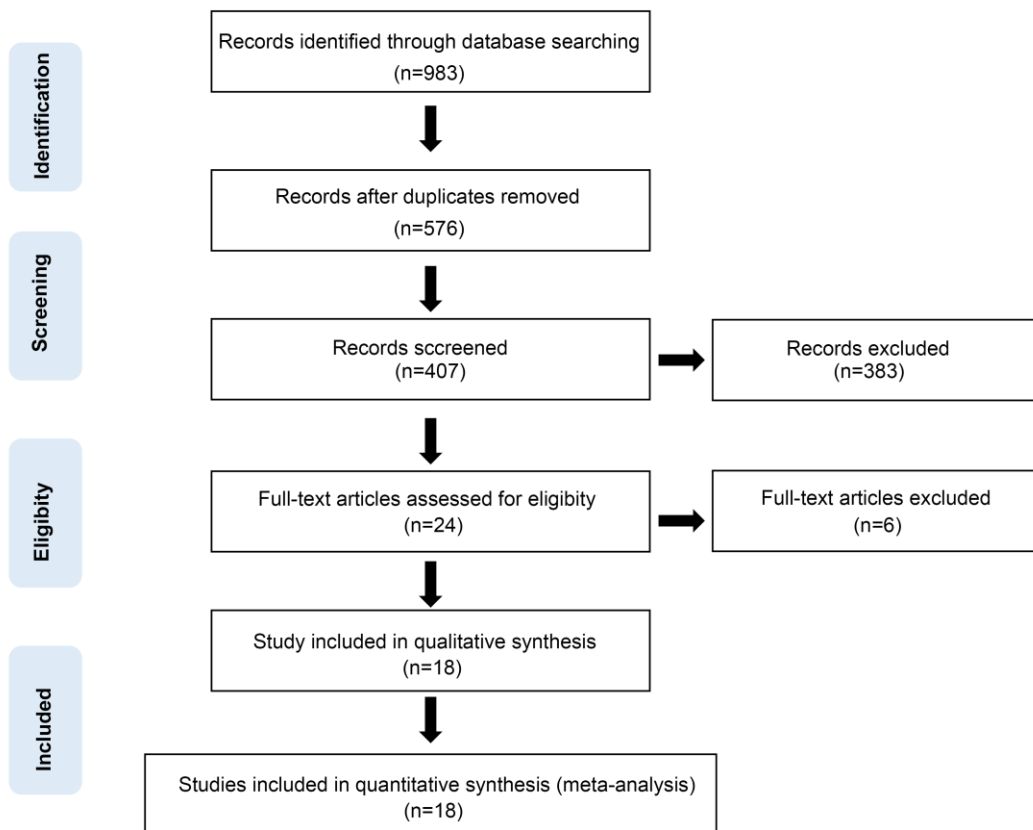

68

69 **Figure S2** Working flow chart of the selection process for eligible studies.

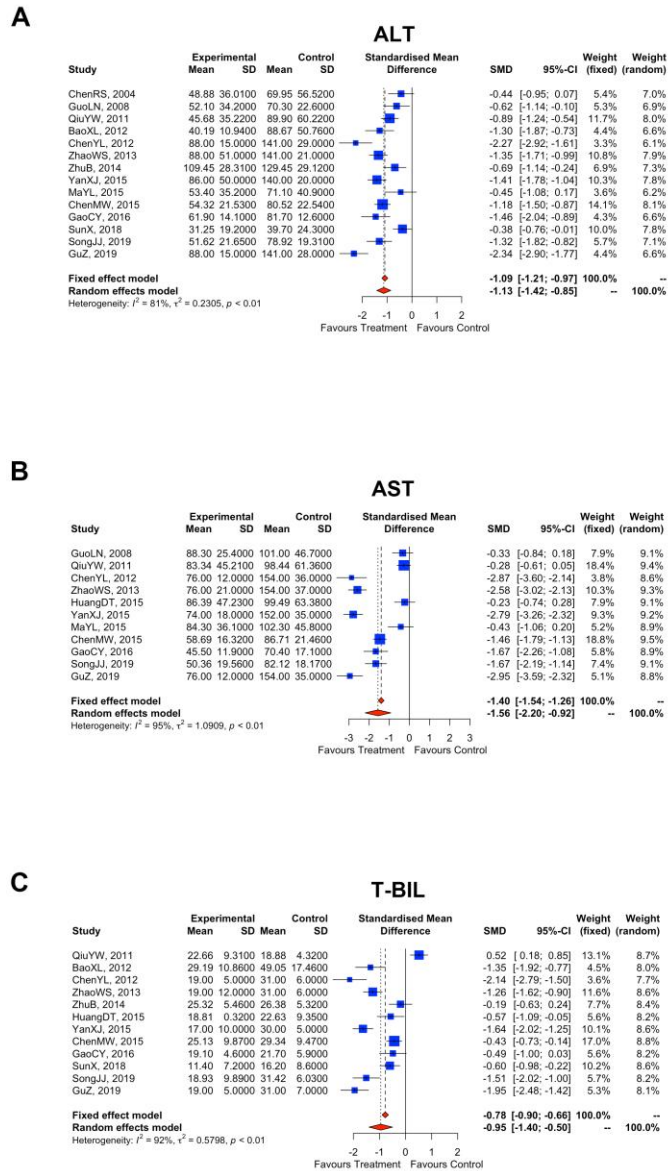

70

71 **Figure S3** Forest plots showing a significant improvement in patients liver function  
 72 after CKI intervention in the experimental group compared with control group,  
 73 including the serum levels of (A) ALT, (B) AST and (C) T-BIL.

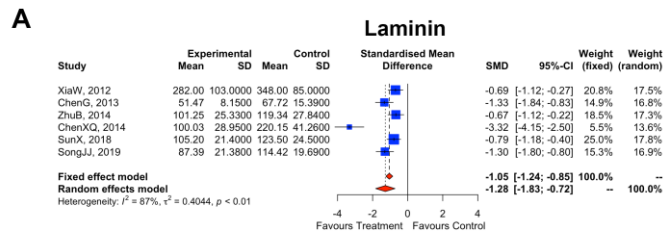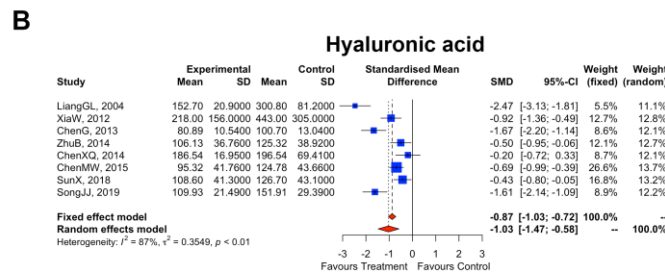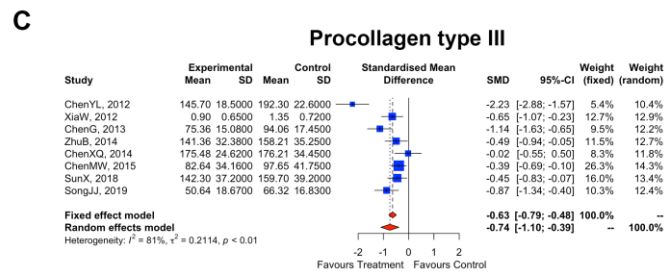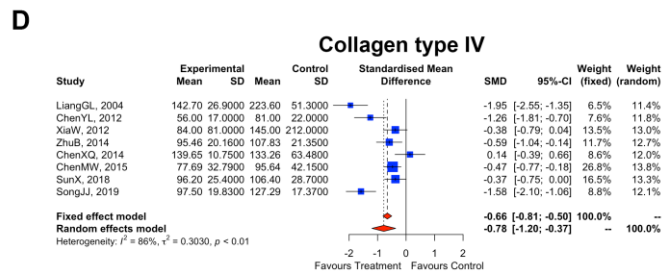

74

75 **Figure S4** Forest plots showing a significant improvement in patients liver fibrosis after

76 CKI intervention in the experimental group compared with control group, including the

77 serum levels of (A) Laminin, (B) Hyaluronic acid, (C) Procollagen type III and (D)

78 Collagen type IV.

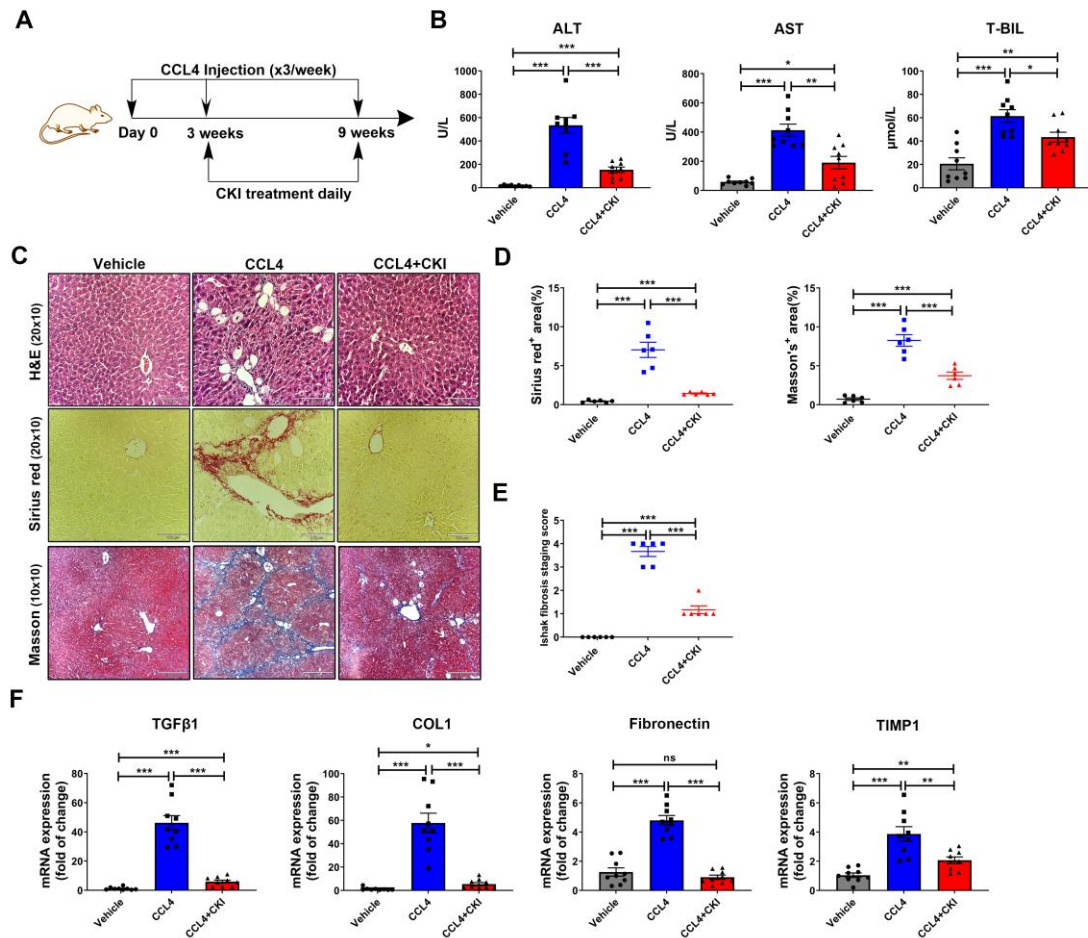

79

80 **Figure S5. CKI attenuates chronic liver fibrosis.**

81 (A) Scheme of experimental procedure for C57BL/6 mice intraperitoneally treated with  
 82 4mL/kg CCl<sub>4</sub> in olive oil for 9 weeks. Mice were intraperitoneally administrated with  
 83 CKI (7.5 mL/kg) mouse for 6 weeks, starting at 3 weeks post initiation of CCl<sub>4</sub>  
 84 challenge. (B) The serum levels of ALT, AST and T-BIL were detected after the final  
 85 CKI treatment in CCl<sub>4</sub>-treated mice (n=9). (C) Mice liver sections were collected for  
 86 H&E (original magnification 20 x 10, scale bar, 110μm), Sirius red (original  
 87 magnification 20 x 10, scale bar, 100μm), and Masson staining (original magnification  
 88 10 x 10, scale bar, 220μm) after final CKI treatment (n=6). (D) Positive Sirius red or  
 89 Masson staining area were quantified by ImageJ analysis (n=6). (E) Ishak fibrosis score

90 of the Sirius red-stained liver sections (n=6). (F) The mRNA expression of *TGF-β1*,  
 91 *COL1A*, *Fibronectin* and *TIMP1* were analyzed by qRT-PCR in mice liver tissues. Data  
 92 are presented as means ± SEM. ns,  $P > 0.05$ ; \*,  $P < 0.05$ ; \*\*,  $P < 0.01$ ; \*\*\*,  $P < 0.001$ .

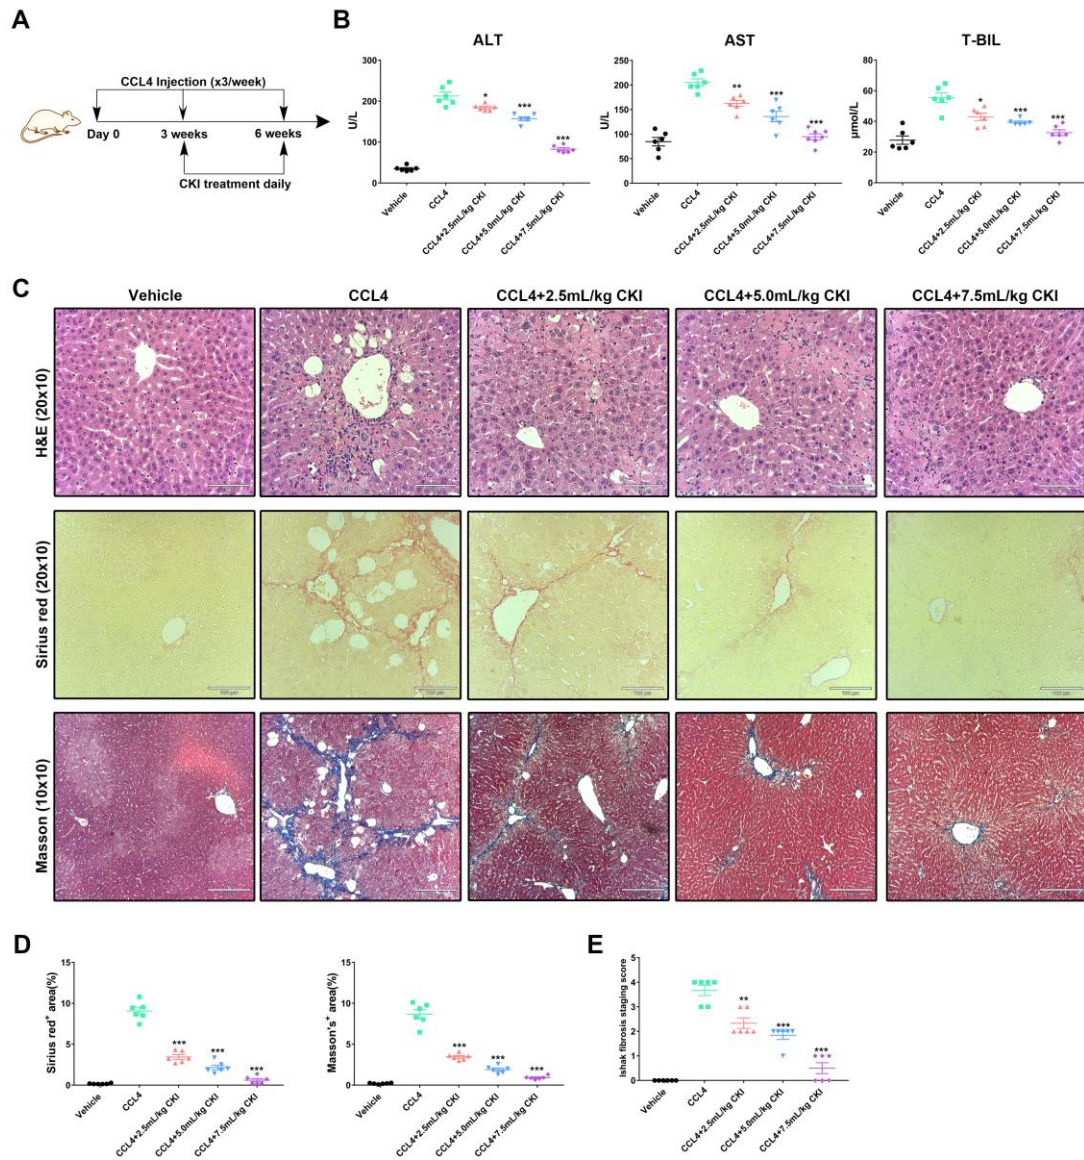

93

94 **Figure S6. CKI inhibits chronic liver fibrosis in a dose-dependent manner.**

95 (A) Scheme of experimental procedure for C57BL/6 mice intraperitoneally treated with  
 96 4mL/kg CCl<sub>4</sub> in olive oil for 6 weeks. Mice were intraperitoneally administrated with  
 97 CKI (2.5, 5.0 and 7.5 mL/kg) for 3 weeks, starting at 3 weeks post initiation of CCl<sub>4</sub>  
 98 challenge. (B) The serum levels of ALT, AST and T-BIL were detected after the final



99 CKI treatment in CCl<sub>4</sub>-treated mice (n=6). (C) Mice liver sections were collected for  
 100 H&E (original magnification 20 x 10, scale bar, 100μm), Sirius red (original  
 101 magnification 20 x 10, scale bar, 100μm), and Masson staining (original magnification  
 102 10 x 10, scale bar, 210μm) after final CKI treatment (n=6). (D) Positive Sirius red or  
 103 Masson staining area were quantified by ImageJ analysis (n=6). (E) Ishak fibrosis score  
 104 of the Sirius red-stained liver sections (n=6). Data are presented as means ± SEM. ns,  
 105  $P > 0.05$ ; \*,  $P < 0.05$ ; \*\*,  $P < 0.01$ ; \*\*\*,  $P < 0.001$ .

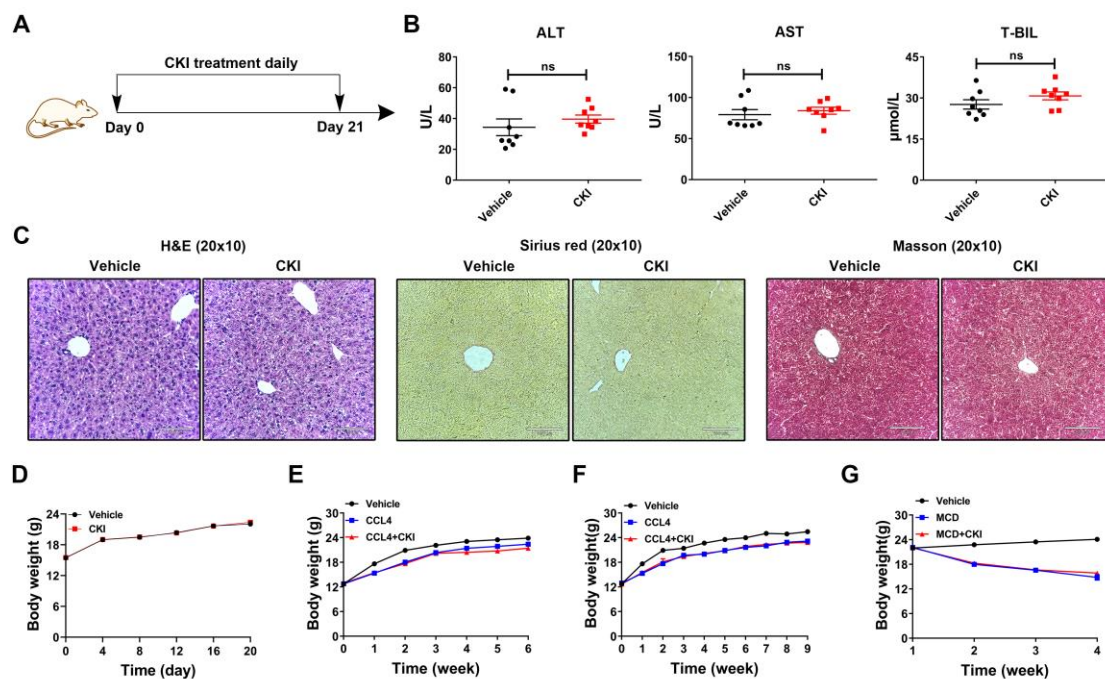

106

107 **Figure S7. CKI treatment has no side effect on mice.**

108 (A) Scheme of experimental procedure for normal C57BL/6 mice intraperitoneally  
 109 administrated with CKI (7.5 mL/kg) for 3 weeks. (B) The serum levels of ALT, AST  
 110 and T-BIL were detected after the final CKI treatment (n=8). (C) Mice liver sections  
 111 were collected for H&E, Sirius red, and Masson staining (original magnification 20 x  
 112 10, scale bar, 100μm). (D-G) The curves of mouse bodyweight changes were shown

113 from different models. (D) related to the model in Supplementary Figure 6A. (E) related  
 114 to the model in Figure 1A. (F) related to the model in Supplementary Figure 4A. (G)  
 115 related to the model in Figure 1C. Data are presented as means  $\pm$  SEM. ns,  $P > 0.05$ .

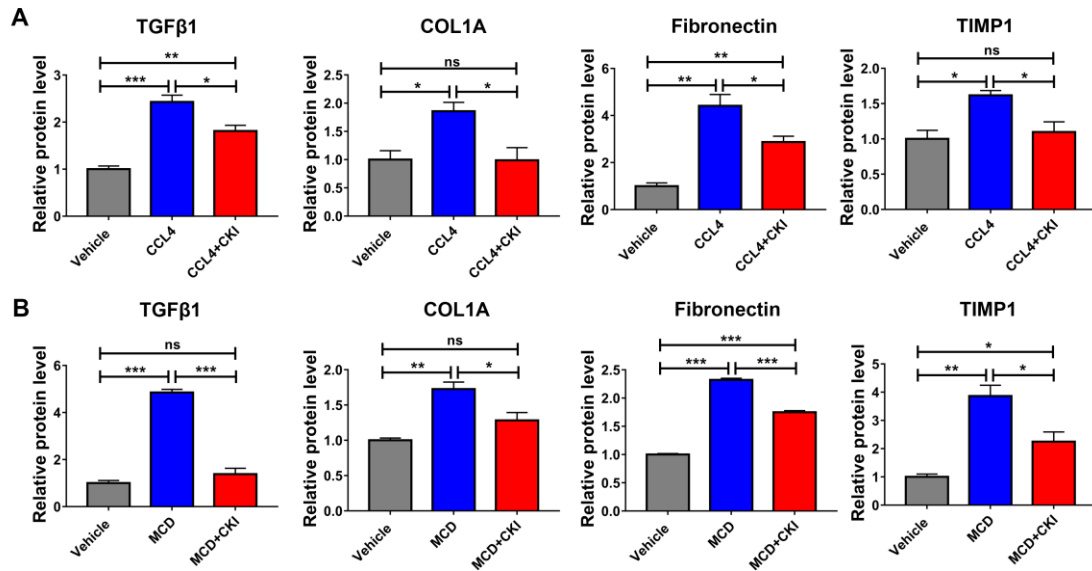

116  
 117 **Figure S8. Protein quantification Related to Figure 1K and L.**

118 (A and B) Quantitative analysis of the protein expression of TGF- $\beta$ 1, COL1A,  
 119 Fibronectin and TIMP1 in liver tissues from CCl<sub>4</sub>-challenged (A) or MCD diet-  
 120 challenged (B) mice. Data are presented as means  $\pm$  SEM. ns,  $P > 0.05$ ; \*,  $P < 0.05$ ; \*\*,   
 121  $P < 0.01$ ; \*\*\*,  $P < 0.001$ .

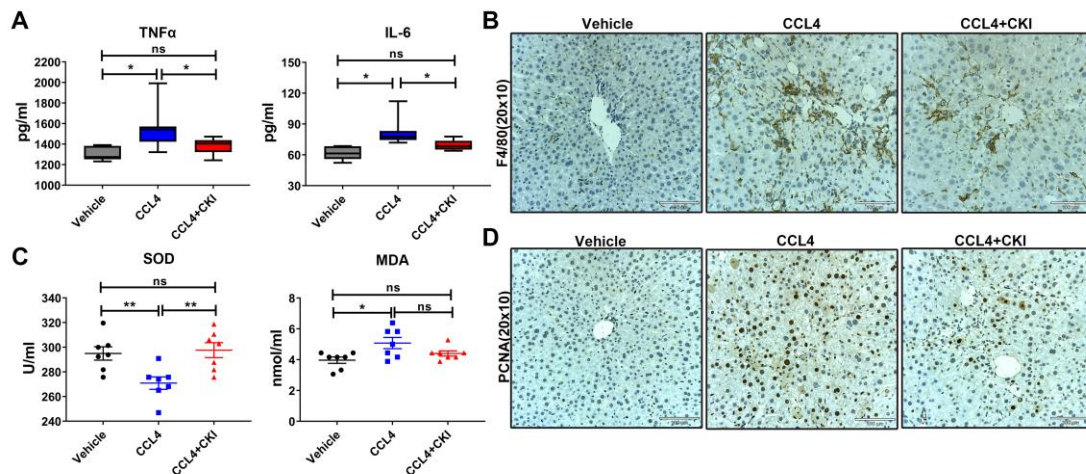

122

123 **Figure S9. CKI ameliorates inflammatory response, oxidative stress, and liver**  
 124 **compensatory proliferation of mice in Supplementary Figure 5A model.**

125 (A) The serum levels of TNF $\alpha$  and IL-6 were detected by Elisa assays (n=9). (B)  
 126 Representative F4/80 immunostaining of macrophages in mice liver sections were  
 127 displayed (original magnification 20 x 10, scale bar, 100 $\mu$ m). (C) The serum levels of  
 128 SOD and MDA were quantified by Elisa assays (n=7). (D) Representative  
 129 immunostaining of PCNA in the liver section of mice were shown after indicated  
 130 treatments (original magnification 20 x 10, scale bar, 100 $\mu$ m). Data are presented as  
 131 means  $\pm$  SEM. ns,  $P > 0.05$ ; \*,  $P < 0.05$ ; \*\*,  $P < 0.01$ ; \*\*\*,  $P < 0.001$ .

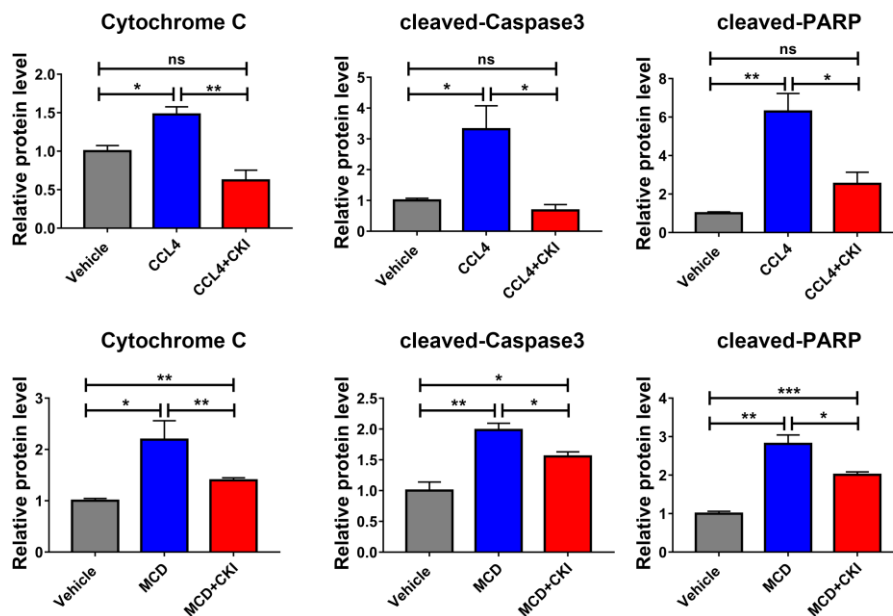

132

133 **Figure S10. Protein quantification Related to Figure 2G.**

134 Quantitative analysis of the protein expression of Cytochrome C, cleaved-Capase3 and  
 135 cleaved-PARP in liver tissues from CCl<sub>4</sub>-challenged or MCD diet-challenged mice.

136 Data are presented as means  $\pm$  SEM. ns,  $P > 0.05$ ; \*,  $P < 0.05$ ; \*\*,  $P < 0.01$ ; \*\*\*,  $P < 0.001$ .

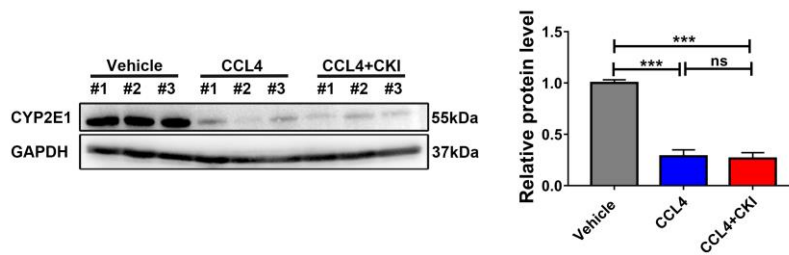

137

138 **Figure S11. CKI treatment has no effect on CCl<sub>4</sub> metabolism *in vivo*.**

139 Mice were intraperitoneally administrated with CKI (7.5 mL/kg) mouse for 6 weeks,  
 140 starting at 3 weeks post initiation of CCl<sub>4</sub> challenge. Western bolt analysis of the  
 141 expression of CYP2E1 in mouse liver lysates.

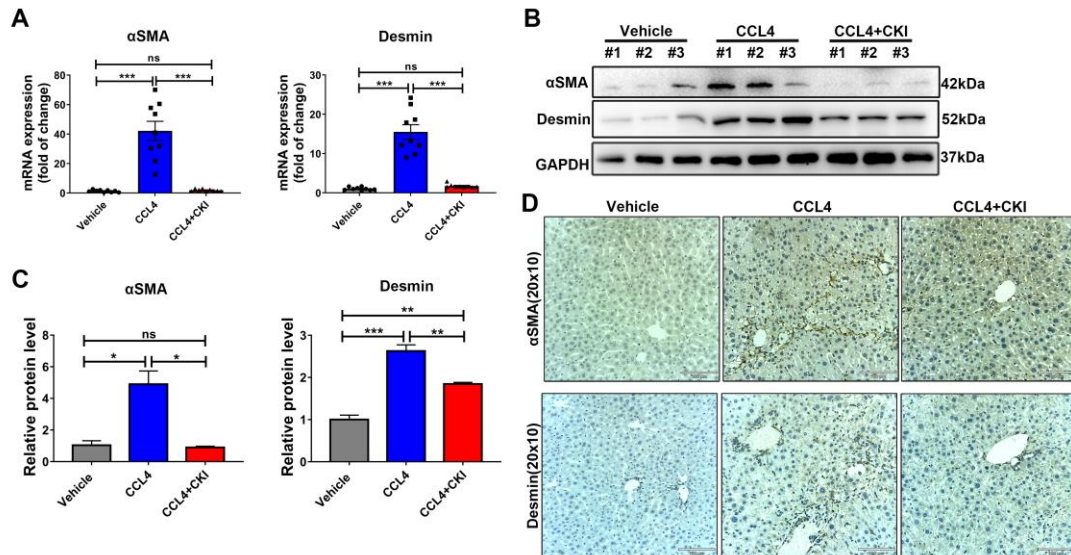

142

143 **Figure S12. CKI inhibits liver fibrosis by suppressing HSCs activation *in vivo* from**  
 144 **Supplementary Figure 5A model.**

145 (A) Mice were treated with CCl<sub>4</sub> for 9 weeks along with CKI treatment for 6 weeks  
 146 (n=9). The mRNA expression of  $\alpha$ SMA and desmin in mice liver tissues were analyzed  
 147 by qRT-PCR. (B) Western blot assay for detecting the expression of  $\alpha$ SMA and desmin  
 148 in mice liver tissues. (C) Quantitative analysis of the protein expression of  $\alpha$ SMA and  
 149 desmin. (D) Representative immunohistochemistry images of  $\alpha$ SMA and desmin stain

150 of liver sections after indicated treatments (original magnification 20 x 10, scale bar,  
 151 100µm). Data are presented as means ± SEM. ns,  $P > 0.05$ ; \*,  $P < 0.05$ ; \*\*,  $P < 0.01$ ; \*\*\*,  
 152  $P < 0.001$ .

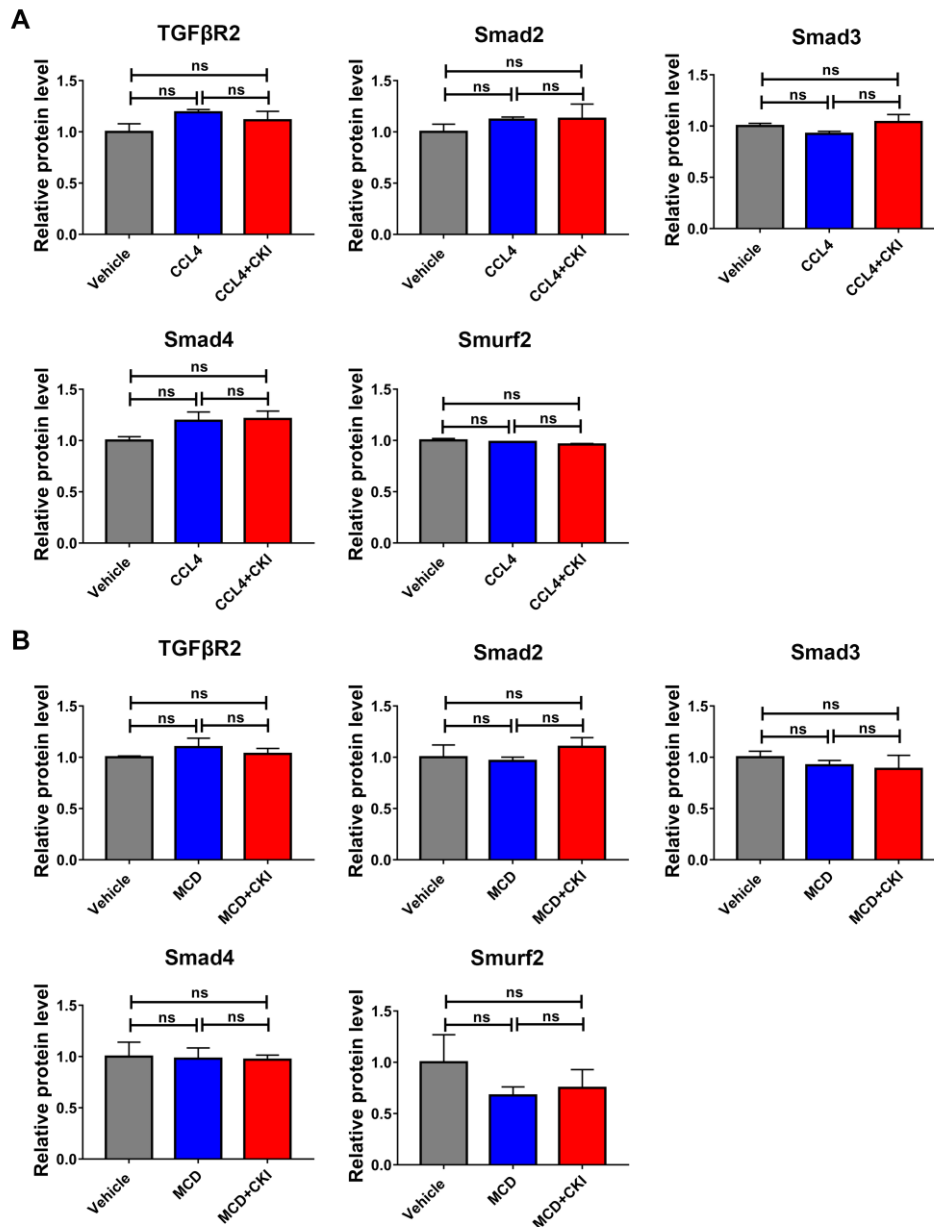

153

154 **Figure S13. Protein quantification Related to Figure 4B and D.**

155 (A and B) Quantitative analysis of the protein expression of TGFβ2, Smad2, Smad3,  
 156 Smad4 and Smurf2 in liver tissues from CCl4-challenged (A) or MCD diet-challenged  
 157 (B) mice. Data are presented as means ± SEM. ns,  $P > 0.05$ .

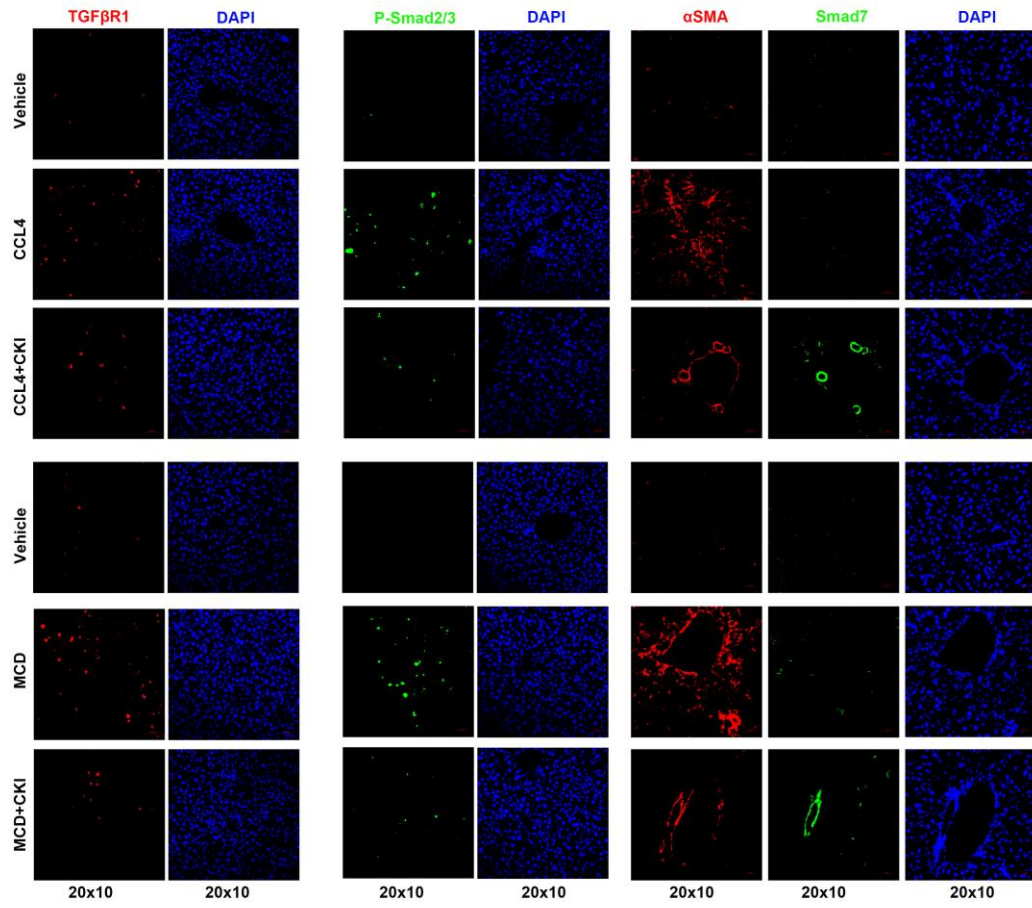

158

159 **Figure S14.** The uncropped immunofluorescence staining images of TGFβR1, p-

160 Smad2/3, αSMA, Smad7 and DAPI for Figure4.

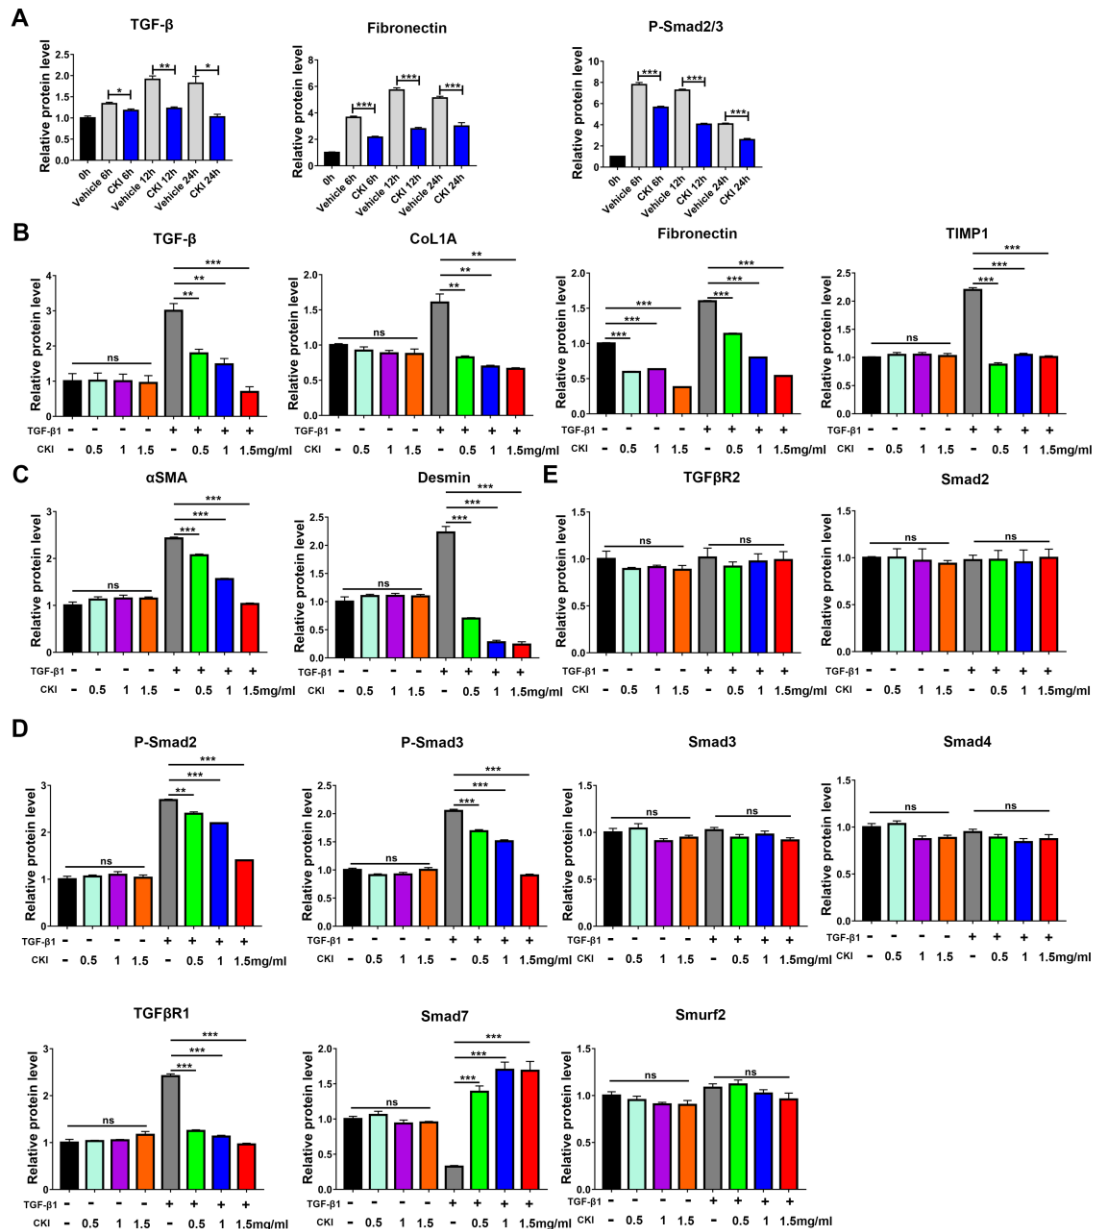

161

162 **Figure S15. Protein quantification Related to Figure 5C, D, G and H.**

163 (A) Quantitative analysis of the protein expression of TGFβ, Fibronectin and p-

164 Smad2/3 in LX-2 cells from Figure 5C. (B) Quantitative analysis of the protein

165 expression of TGFβ, COL1A, Fibronectin and TIMP1 protein levels in LX-2 cells from

166 Figure 5B. (C) Quantitative analysis of the protein expression of αSMA and desmin in

167 LX-2 cells from Figure 5G. (D and E) Quantitative analysis of the protein expression

168 of TGFβR1, TGFβR2, p-Smad2, total Smad2, p-Smad3, total Smad3, Smad4, Smad7

169 and Smurf2 in LX-2 cells from Figure 5H. Data are presented as means  $\pm$  SEM. ns,  
 170  $P > 0.05$ ; \*,  $P < 0.05$ ; \*\*,  $P < 0.01$ ; \*\*\*,  $P < 0.001$ .

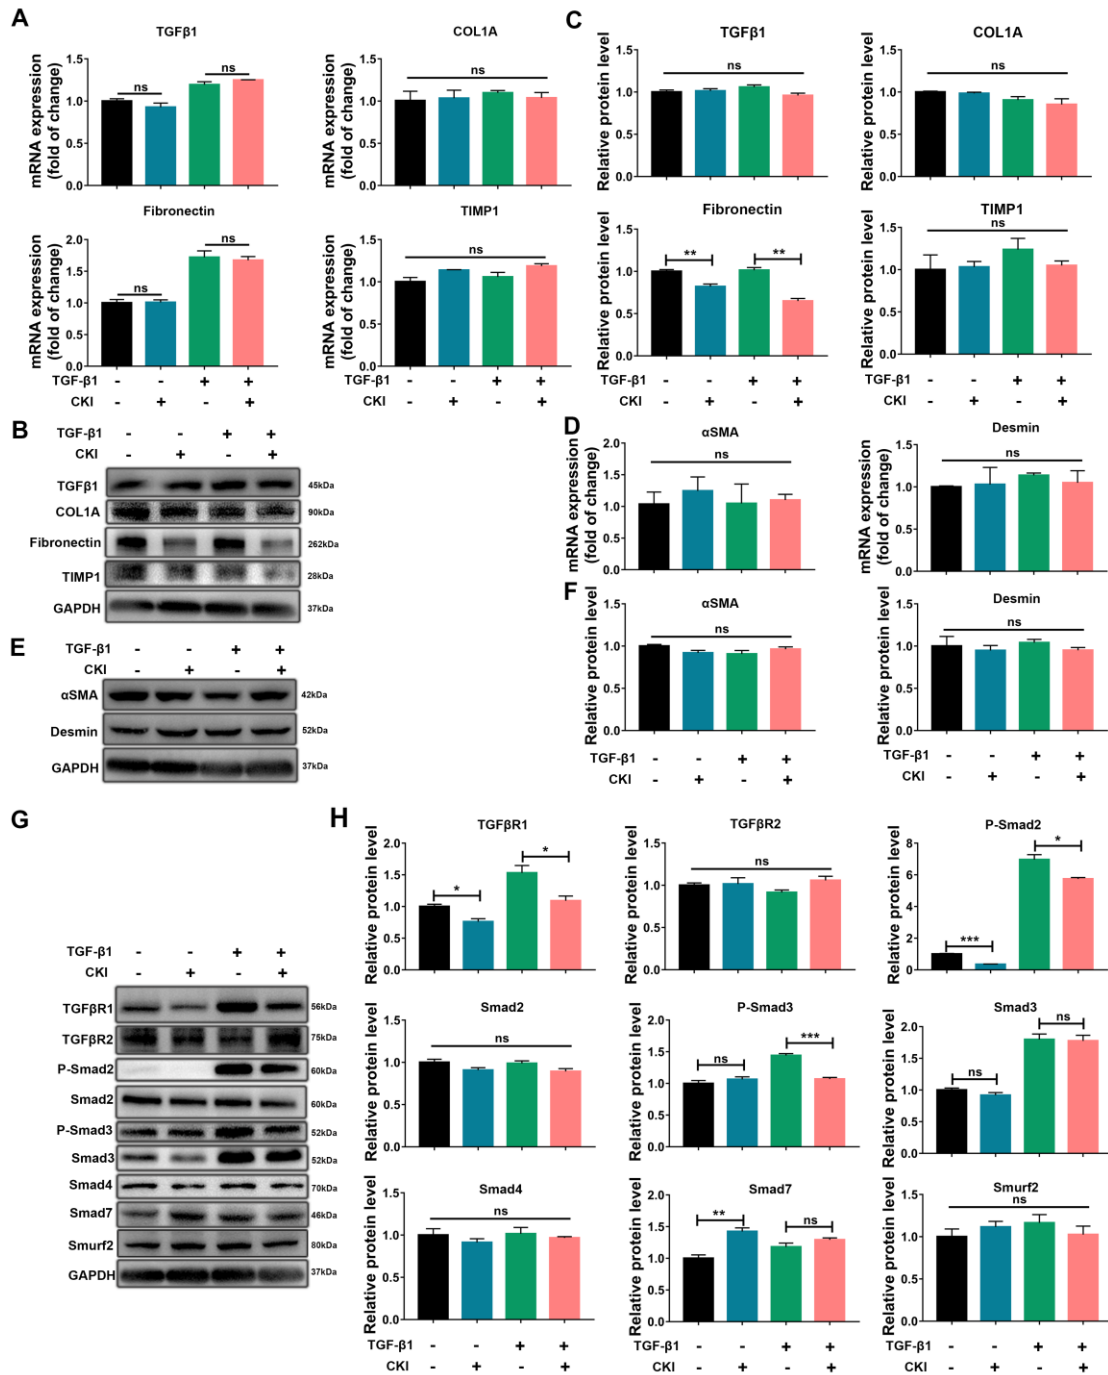

171

172 **Figure S16. The influence of CKI on LO2 cells *in vitro*.**

173 (A) LO2 cells were treated with 5ng/mL TGF-β1 along with 1mg/mL CKI for 12h. The

174 mRNA expression of *TGF-β1*, *COL1A*, *Fibronectin* and *TIMP1* were detected by qRT-



175 PCR in LO2 cell lysates. (B) Western bolt for TGF- $\beta$ 1, COL1A, Fibronectin and TIMP1  
176 in LO2 cells after CKI treatment. (C) Quantitative analysis of the protein expression of  
177 TGF- $\beta$ 1, COL1A, Fibronectin and TIMP1. (D) qRT-PCR analysis of  $\alpha$ SMA and desmin  
178 *mRNA* expression in LO2 cells. (E) The protein expression of  $\alpha$ SMA and desmin were  
179 quantified by western blot in LO2 cells. (F) Quantitative analysis of the protein  
180 expression of  $\alpha$ SMA and desmin. (G) Western blot analysis of TGF $\beta$ R1, TGF $\beta$ R2, p-  
181 Smad2, total Smad2, p-Smad3, total Smad3, Smad4, Smad7 and Smurf2 in LO2 cells.  
182 (H) Quantitative analysis of the protein expression of TGF $\beta$ R1, TGF $\beta$ R2, p-Smad2,  
183 total Smad2, p-Smad3, total Smad3, Smad4, Smad7 and Smurf2. Data are presented as  
184 means  $\pm$  SEM. ns,  $P > 0.05$ ; \*,  $P < 0.05$ ; \*\*,  $P < 0.01$ ; \*\*\*,  $P < 0.001$ .

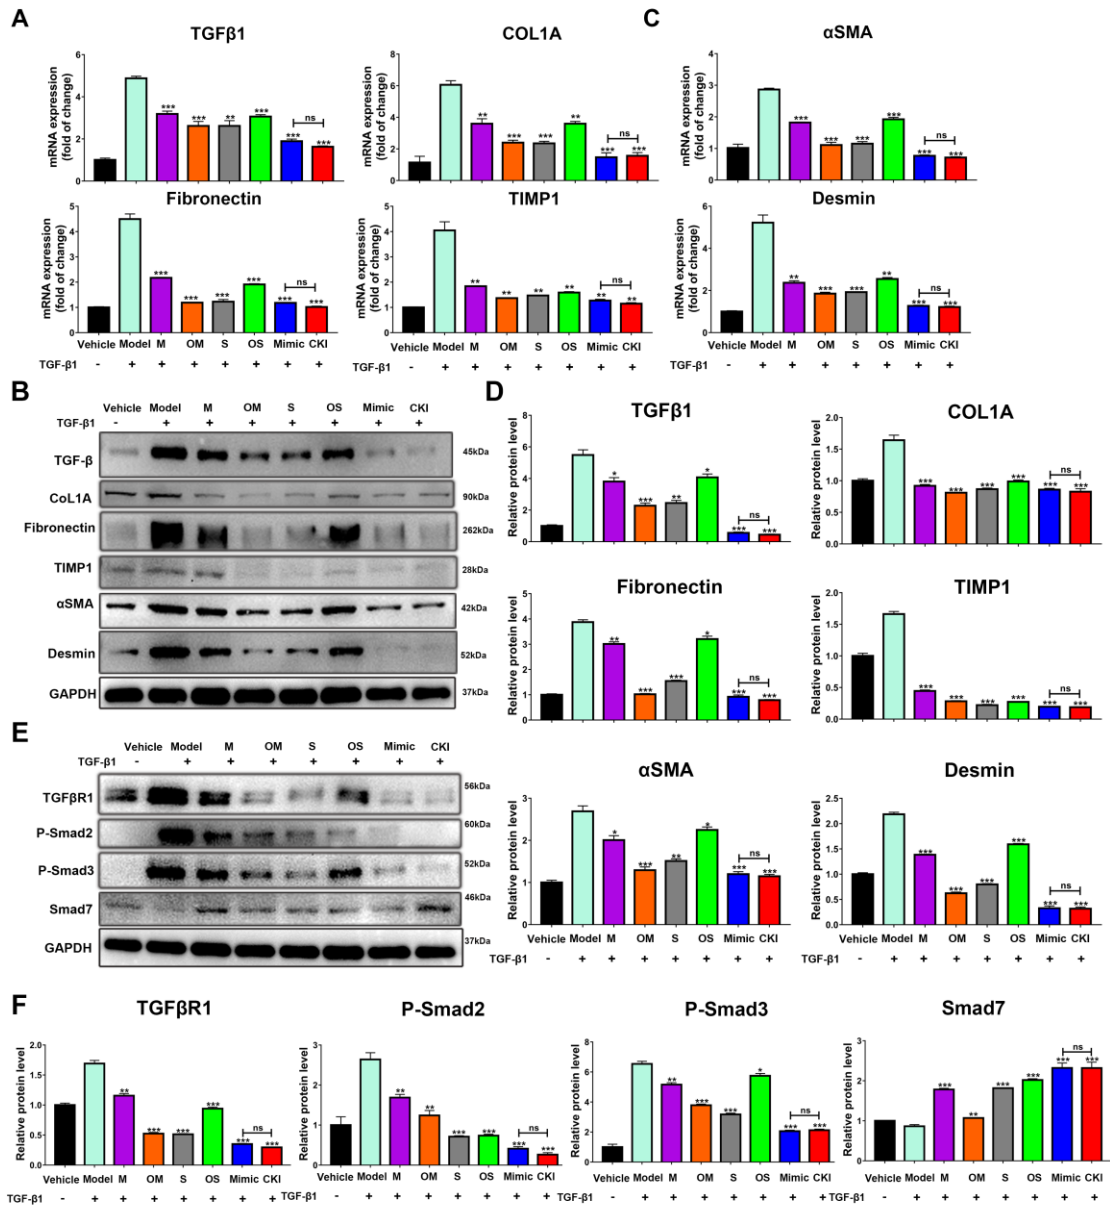

185

186 **Figure S17. The material basis responsible for the antifibrosis effect of CKI.**

187 (A) LX-2 cells were treated with or without 5ng/mL TGF-β1 along with Matrine (M,

188 0.3034mg/mL), Oxymatrine (OM, 0.964mg/mL), Sophocarpine (S, 0.0827mg/mL),

189 OxySophocarpine (OS, 0.229mg/mL), Mimic (M+OM+S+OS) and CKI (1.5mg/mL)

190 for 12h. The mRNA expression of *TGF-β1*, *COL1A*, *Fibronectin*, and *TIMP1* were

191 detected by qRT-PCR in LX-2 cell lysates. (B) The protein expression of TGFβ,

192 COL1A, Fibronectin, TIMP1, αSMA and desmin were quantified by western blot in

193 LX-2 cells. (C) qRT-PCR analysis of HSCs activation markers *αSMA* and *desmin*  
 194 mRNA expression in LX-2 cells. (D) Quantitative analysis of the protein expression of  
 195 TGFβ, COL1A, Fibronectin, TIMP1, αSMA and desmin. (E) Western blot analysis of  
 196 TGFβR1, p-Smad2, p-Smad3 and Smad7 in LX-2 cells. (F) Quantitative analysis of the  
 197 protein expression of TGFβR1, p-Smad2, p-Smad3 and Smad7. Data are presented as  
 198 means ± SEM. ns,  $P>0.05$ ; \*\*,  $P<0.01$ ; \*\*\*,  $P<0.001$ .

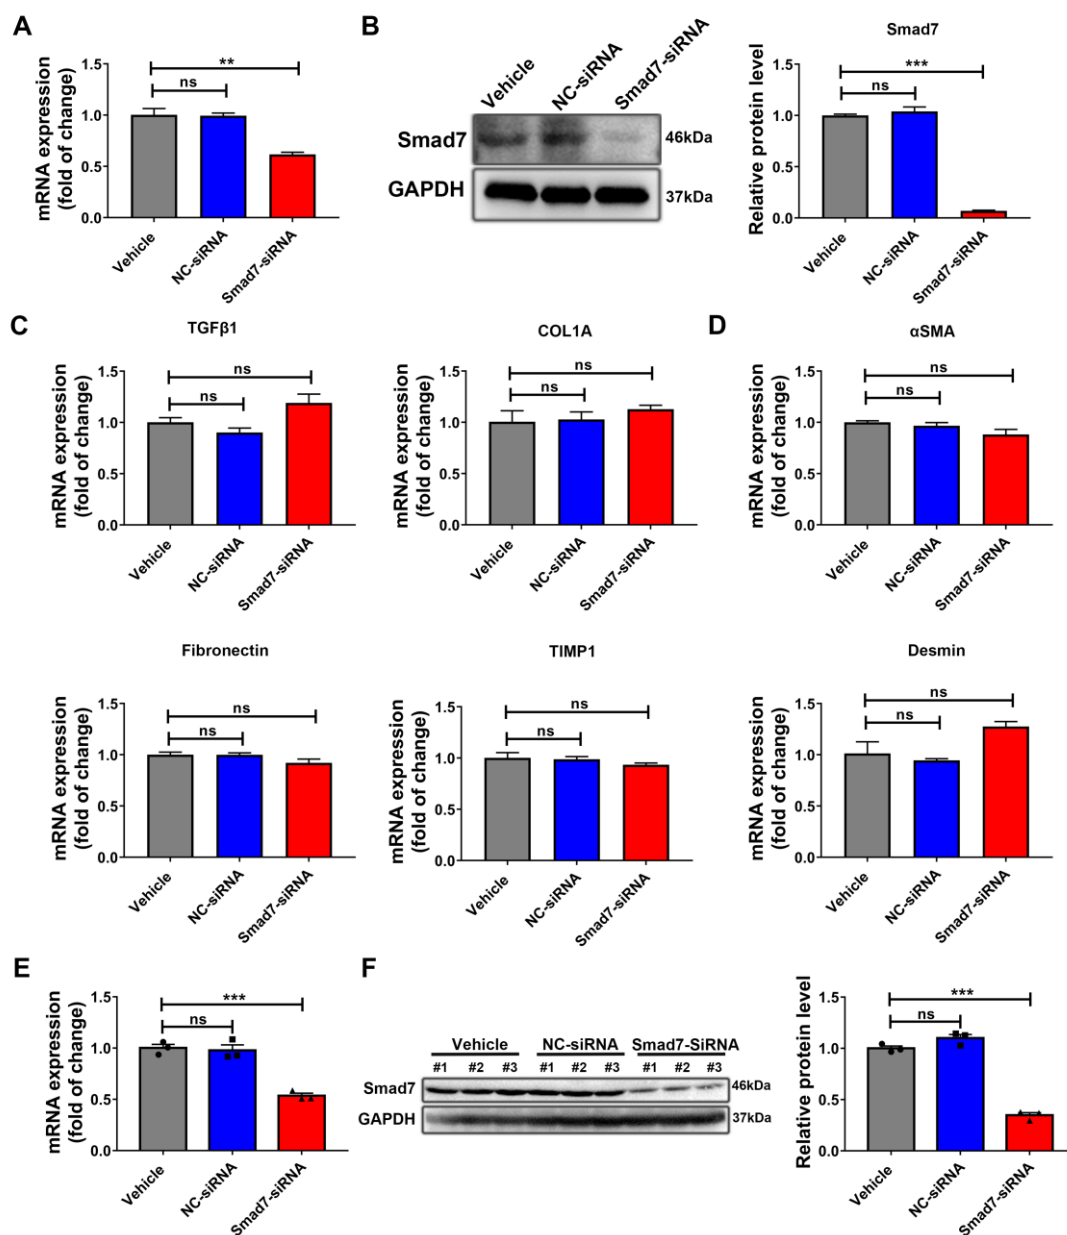

199

200 **Figure S18. The knock-down efficiency of Smad7-siRNA *in vitro* and *in vivo*.**

201 (A and B) The mRNA and protein levels of Smad7 in LX-2 cells after Smad7-siRNA  
202 treatment. (C) Smad7 siRNA-knockdown has no effect on the mRNA expression of  
203 *TGF-β1*, *COL1A*, *Fibronectin* and *TIMP1* in quiescent LX-2 cells. (D) Smad7 siRNA-  
204 knockdown didn't influence the activation of quiescent LX-2 cells *in vitro*. (E and F)  
205 72h after 5mg/kg Smad7-siRNA treatment, the knockdown efficiency of Smad7-siRNA  
206 in mouse livers were explored by qRT-PCR and western blotting (n=3). Data are  
207 presented as means ± SEM. ns,  $P>0.05$ , \*\*,  $P<0.01$ ; \*\*\*,  $P<0.001$ .  
208

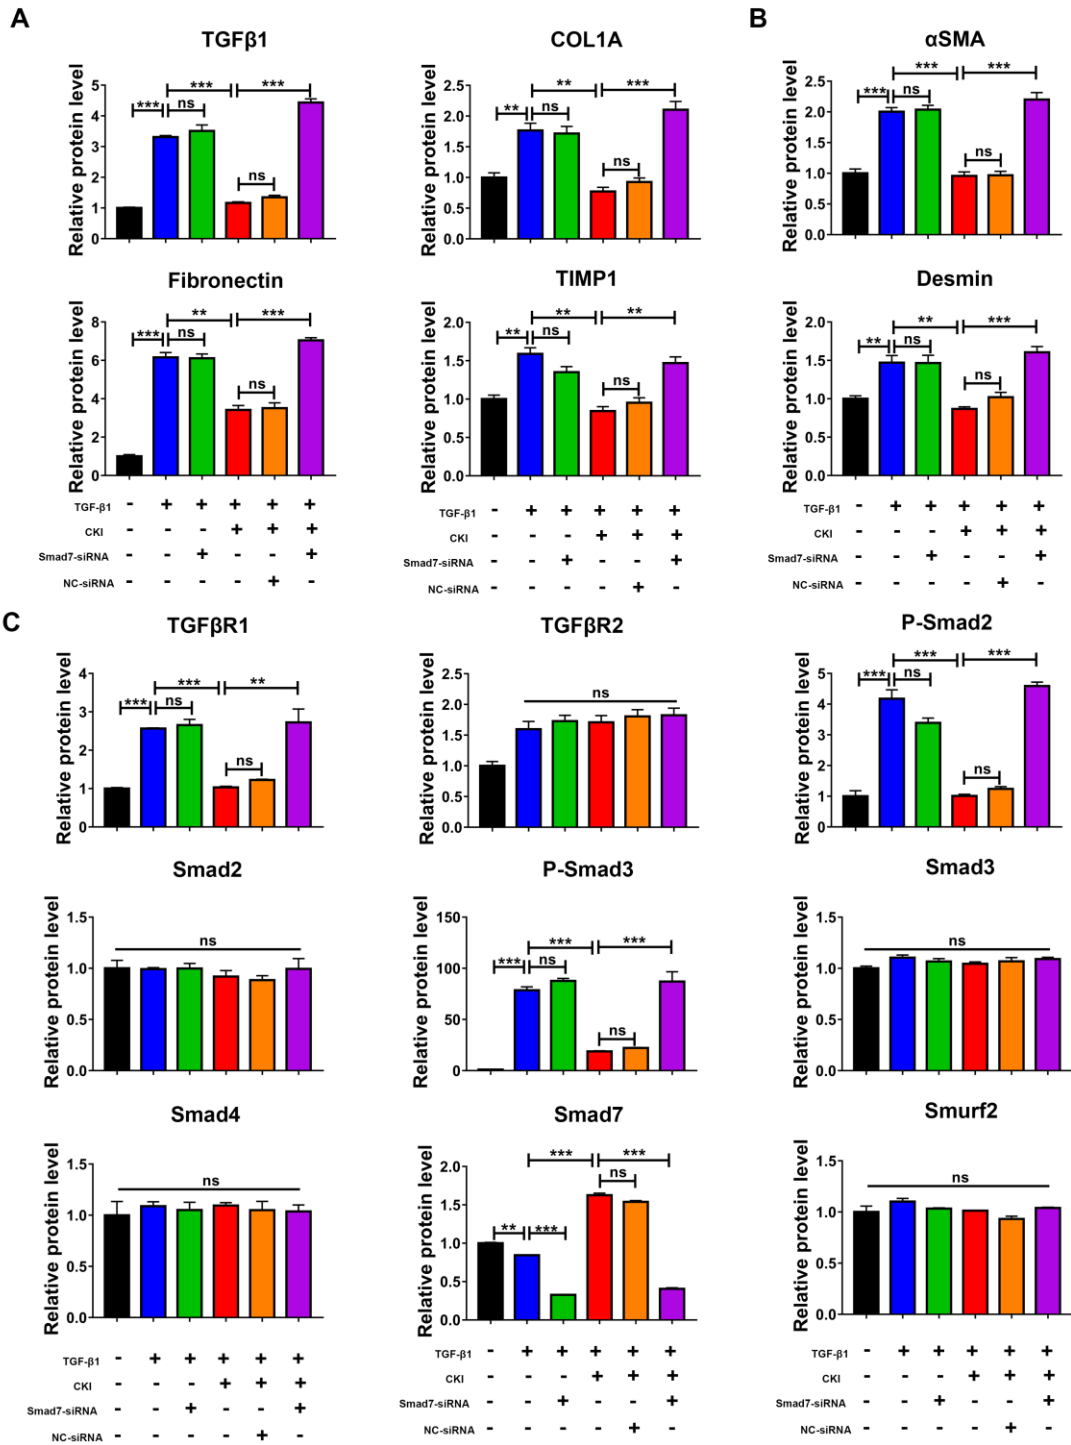

209

210 **Figure S19. Protein quantification Related to Figure 6C, E and F.**

211 (A) Quantitative analysis of the protein expression of TGFβ, COL1A, Fibronectin and

212 TIMP1 from Figure 6C. (B) Quantitative analysis of the protein expression of αSMA

213 and desmin from Figure 6E. (C) Quantitative analysis of the protein expression of

214 TGFβR1, TGFβR2, p-Smad2, total Smad2, p-Smad3, total Smad3, Smad4, Smad7 and  
 215 Smurf2 from Figure 6F. Data are presented as means ± SEM. ns,  $P>0.05$ ; \*\*,  $P<0.01$ ;  
 216 \*\*\*,  $P<0.001$ .

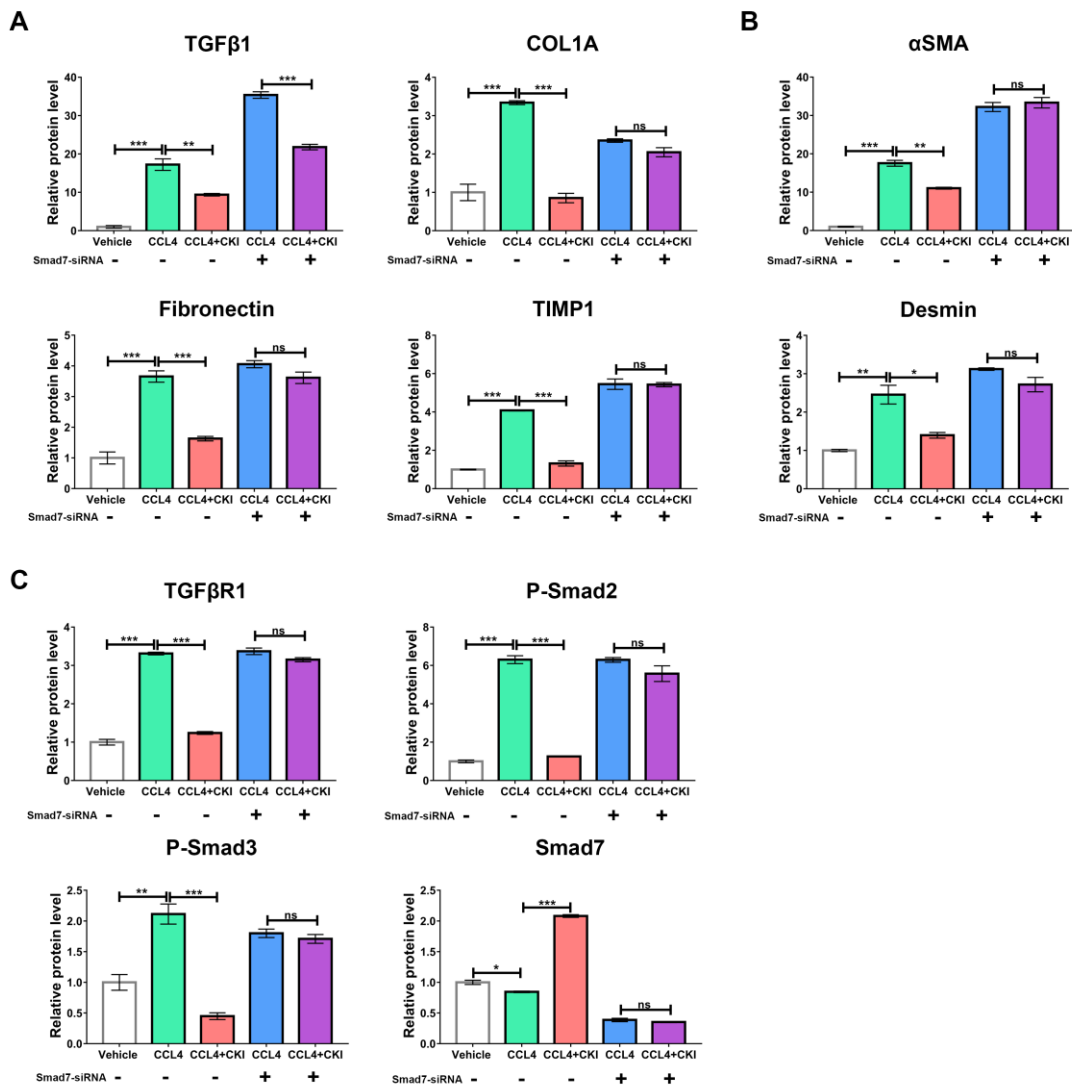

217

218 **Figure S20. Protein quantification Related to Figure 7G, I and J.**

219 (A) Quantitative analysis of the protein expression of TGF-β1, COL1A, Fibronectin  
 220 and TIMP1 from Figure 7G. (B) Quantitative analysis of the protein expression of  
 221 αSMA and desmin in Figure 7I. (C) Quantitative analysis of the protein expression of

222 TGFβR1, p-Smad2, p-Smad3 and Smad7 from Figure 7J. Data are presented as means  
223 ± SEM. ns,  $P > 0.05$ ; \*,  $P < 0.05$ ; \*\*,  $P < 0.01$ ; \*\*\*,  $P < 0.001$ .

224

225

226

227

228

229

230

231

232

233

234

235

236

237

238

239

240

241

242

243

244

245

246

247 **Supplementary tables**

248

249 **Table S1. The identified primary bioactive alkaloid content in CKI by HPLC**

| <b>Alkaloid</b> | <b>Molecular formula</b> | <b>Concentration</b> |
|-----------------|--------------------------|----------------------|
| Oxymatrine      | $C_{15}H_{25}O_2N_2$     | 9.640mg/ml           |
| Oxysophocarpine | $C_{15}H_{23}O_2N_2$     | 2.290mg/ml           |
| Matrine         | $C_{15}H_{25}ON_2$       | 3.034mg/ml           |
| Sophocarpine    | $C_{15}H_{23}ON_2$       | 0.827mg/ml           |

250

251

252

253

254

255

256

257

258

259

260

261

262

263

264

265

266

267

268

269

270

271

272

273

274

275

276

277

278

279

280

281



**Table S2. Mouse primer sequences for real-time PCR**

| <b>Targets</b> |         | <b>Primer sequence (5'-3')</b> |
|----------------|---------|--------------------------------|
| GAPDH          | Forward | ATGTTCCAGTATGACTCCACTCAC       |
|                | Reverse | GACACAGTAGACTCCACGACATA        |
| $\beta$ -actin | Forward | AGAGGGAAATCGTGCGTGAC           |
|                | Reverse | CAATAGTGATGACCTGGCCGT          |
| TGF- $\beta$ 1 | Forward | GGTTCATGTCATGGATGGTGC          |
|                | Reverse | TGACGTCACTGGAGTTGTAC           |
| CoL1A          | Forward | GGAAACCTCTCTCGCCTCTT           |
|                | Reverse | GAACAGGGTGTTCCTGAGA            |
| Fibronectin    | Forward | GGCTACATCATCCGCCATCA           |
|                | Reverse | GCCCGGATTAAGGTTGGTGA           |
| TIMP1          | Forward | GGCTAAATTCATGGGTTTAC           |
|                | Reverse | CTCAGAGTACGCCAGGGAACCA         |
|                | Reverse | AGTTGCTTCTAGCCCAAAGAAC         |
| $\alpha$ SMA   | Forward | CATCACCAACTGGGACGACA           |
|                | Reverse | TCCGTTAGCAAGGTCGGATG           |
| Desmin         | Forward | GTGGATGCAGCCACTCTAGC           |
|                | Reverse | TTAGCCGCGATGGTCTCATAAC         |
| Smad7          | Forward | GGCCGGATCTCAGGCATTC            |
|                | Reverse | TTGGGTATCTGGAGTAAGGAGG         |

283

284

285

286

287

288

289

290

291

292

293

294

**Table S3. Human primer sequences for real-time PCR**

| <b>Targets</b> |         | <b>Primer sequence (5'-3')</b> |
|----------------|---------|--------------------------------|
| GAPDH          | Forward | AAGAAGG TGGTGAAGCAGGC          |
|                | Reverse | TCCACCACCCT GTTGCTGTA          |
| Actin          | Forward | GTTGTCGACGACGAGCG              |
|                | Reverse | GCACAGAGCCTCGCCTT              |
| TGF- $\beta$ 1 | Forward | CAATTCCTGGCGATACCTCAG          |
|                | Reverse | GCACAACCTCCGGTGACATCAA         |
| CoL1A          | Forward | TGGCCAAGAAGACATCCCTGAAGT       |
|                | Reverse | ACATCAGGTTTCCACGTCTCACCA       |
| Fibronectin    | Forward | CCATCGCAA ACCGCTGCCAT          |
|                | Reverse | AACACTTCTCAGCTATGGGCTT         |
| TIMP1          | Forward | CTTCTGCAATTCCGACCTCGT          |
|                | Reverse | ACGCTGGTATAAGGTGGTCTG          |
| $\alpha$ SMA   | Forward | ACTG AGCGTGGCTATTCTCCGTT       |
|                | Reverse | GCAGTGGCCATCTCATTTTCA          |
| Desmin         | Forward | GACGTGGATGCAGCTACTCTA          |
|                | Reverse | GGAACGCGATCTCCTCGTTG           |
| Smad7          | Forward | GGACAGCTCAATTCGGACAAC          |
|                | Reverse | GTACACCCACACACCATCCAC          |

296

297

298

299

300

301

302

303

304

305

306

307

308

309

**Table S4 Primary antibodies information**

| <b>Product code</b> | <b>Name</b>                             | <b>Dilution range</b> | <b>Company</b> |
|---------------------|-----------------------------------------|-----------------------|----------------|
| ab13575             | Cytochrome C                            | 1:1000                | Abcam          |
| 9661                | cleaved-Caspase3                        | 1:1000                | CST            |
| 9544                | cleaved-PARP                            | 1:1000                | CST            |
| 3711                | TGF- $\beta$                            | 1:1000                | CST            |
| sc-59772            | COL1A                                   | 1:200                 | Santa Cruz     |
| ab2413              | Fibronectin                             | 1:1000                | Abcam          |
| sc-21734            | TIMP1                                   | 1:200                 | Santa Cruz     |
| ab5694              | $\alpha$ SMA                            | 1:1000                | Abcam          |
| ab15200             | Desmin                                  | 1:1000                | Abcam          |
| ab28146             | CYP2E1                                  | 1:1000                | Abcam          |
| ab31013             | TGF- $\beta$ R1                         | 1:1000                | Abcam          |
| sc-17702            | TGF- $\beta$ R2                         | 1:200                 | Santa Cruz     |
| sc-365846           | Smad7                                   | 1:200                 | Santa Cruz     |
| 8828                | P-Smad2/3                               | 1:1000                | CST            |
| 3108                | P-Smad2                                 | 1:1000                | CST            |
| 5339                | Smad2                                   | 1:1000                | CST            |
| 9520                | P-Smad3                                 | 1:1000                | CST            |
| 9523                | Smad3                                   | 1:1000                | CST            |
| 38454               | Smad4                                   | 1:1000                | CST            |
| 12024               | Smurf2                                  | 1:1000                | CST            |
| 2118                | GAPDH                                   | 1:1000                | CST            |
| 7074                | Anti-rabbit IgG HRP-linked              | 1:2000                | CST            |
| 7076                | Anti-mouse IgG HRP-linked               | 1:2000                | CST            |
| 5127                | Anti-rabbit IgG (conformation specific) | 1:2000                | CST            |
| sc-516102           | m-IgGk BP-HRP                           | 1:2000                | Santa Cruz     |

**Table S5 Characteristics of the included trials**

| Study ID      | Sample size (M/F) |           | Age         |             | Progress (year) |           | Etiology                           |
|---------------|-------------------|-----------|-------------|-------------|-----------------|-----------|------------------------------------|
|               | Control           | Treatment | Control     | Treatment   | Control         | Treatment |                                    |
| Song J. 2019  | 22/16             | 21/17     | 43.34±3.9   | 43.15±3.65  | 3.66±0.71       | 3.79±0.54 | HBV induced liver inflammation     |
| Chen R. 2004  | 17/13             | 19/11     | 16-59       | 17-56       | NR              |           | HBV induced liver inflammation     |
| Sun X. 2018   | 30/25             | 29/26     | 44.15±11.82 | 43.95±12.37 | 2.40±1.57       | 2.34±1.62 | HBV induced liver inflammation     |
| Zhu B. 2014   | 48/32             |           | 42.15±9.31  |             | 10.32±3.12      |           | HBV induced liver inflammation     |
| Zhao W. 2013  | 52/20             | 53/19     | 40±6        | 41±5        | 6±2.5           | 6±2.5     | HBV induced liver inflammation     |
| Qiu Y. 2011   | 43/27             | 42/28     | 16-56       | 18-59       | NR              |           | HBV induced liver inflammation     |
| Yan X. 2015   | 76/64             |           | 42.15±8.98  |             | NR              |           | HBV induced liver inflammation     |
| Bao X. 2014   | 38/20             |           | 40 ± 9.1    |             | NR              |           | HBV induced liver cirrhosis        |
| Guo L. 2008   | 21/9              | 18/12     | 20-56       | 18-60       | NR              |           | HCV induced liver inflammation     |
| Ma Y. 2015    | 12/8              | 11/9      | 36.5±0.5    | 38.2±0.5    | NR              |           | HCV induced liver inflammation     |
| Gao C. 2016   | 20/10             | 19/11     | 52.6±8.9    | 54.1±7.7    | 2.6±1           | 2.8±0.8   | HCV induced liver inflammation     |
| Chen Y. 2012  | 35/25             |           | 52.2±7.6    | 53.9±6.9    | NR              |           | HBV or HCV induced liver cirrhosis |
| Chen M, 2015  | 56/34             | 51/39     | 56.78±12.32 | 52.31±12.56 | NR              |           | HBV or HCV induced liver cirrhosis |
| Gu Z, 2019    | 23/18             | 25/16     | 55.5±6.4    | 54.2±3.2    | 4.44±1.06       | 4.53±1.09 | HBV induced liver cirrhosis        |
| Chen G, 2013  | 45/30             |           | 41.05±9.64  |             | NR              |           | HBV induced liver cirrhosis        |
| Xia W, 2012   | 35/10             | 32/13     | 21-53       | 25-53       | NR              |           | HBV induced liver fibrosis         |
| Liang G, 2004 | 23/9              | 22/10     | 36.1±12.8   | 38±13.3     | 6.8±4.8         | 7.6±4.3   | HBV induced liver fibrosis         |
| Chen X, 2014  | 16/12             | 16/12     | 40.1±5.9    | 40.4±6.2    | 4.8±1.6         | 4.9±1.1   | HCV induced liver cirrhosis        |

**Table S6 Intervention characteristics and outcome measures of the included trials**

| Study ID      | Intervention (Day)         |                                            | Duration  | Outcomes measures                   |
|---------------|----------------------------|--------------------------------------------|-----------|-------------------------------------|
|               | Control                    | Treatment                                  |           |                                     |
| Song J. 2019  | Entacvir                   | CKI, 20mL, iv + Entacvir                   | 8 weeks   | ALT, AST, T-BIL, LN, HA, COL3, COL4 |
| Chen R. 2004  | Diammonium glycyrrhizinate | CKI, 20mL, iv + Diammonium glycyrrhizinate | 8 weeks   | ALT, AST, T-BIL                     |
| Sun X. 2018   | Interferon $\alpha$ -1b    | CKI, 10mL, iv + Interferon $\alpha$ -1b    | 6 weeks   | ALT, T-BIL, LN, HA, COL3, COL4      |
| Zhu B. 2014   | Adefovir dipivoxil         | CKI, 10mL, iv + Adefovir dipivoxil         | 8 weeks   | ALT, T-BIL, LN, HA, COL3, COL4      |
| Zhao W. 2013  | Entacvir                   | CKI, 20mL, iv + Entacvir                   | 8 weeks   | ALT, AST, T-BIL                     |
| Qiu Y. 2011   | Lamivudine                 | CKI, 20mL, iv + Lamivudine                 | 8 weeks   | ALT, AST, T-BIL                     |
| Yan X. 2015   | Lamivudine                 | CKI, 20mL, iv + Lamivudine                 | 6 weeks   | ALT, AST, T-BIL                     |
| Bao X. 2014   | Hepatinica                 | CKI, 600mg, iv + Hepatinica                | 8 weeks   | ALT, T-BIL                          |
| Guo L. 2008   | Interferon injection       | CKI, 20mL, iv + Interferon injection       | 12 weeks  | ALT, AST                            |
| Ma Y. 2015    | Interferon injection       | CKI, 20mL, iv + Interferon injection       | 3 months  | ALT, AST                            |
| Gao C. 2016   | Hepatinica                 | CKI, 20mL, iv + Bicyclol                   | 6 months  | ALT, AST, T-BIL                     |
| Chen Y. 2012  | Hepatinica                 | CKI, 20mL, iv + Hepatinica                 | 8 weeks   | ALT, AST, T-BIL, COL3, COL4         |
| Chen M, 2015  | Hepatinica                 | CKI, 600mg, iv + Hepatinica                | 6 months  | ALT, AST, T-BIL, HA, COL3, COL4     |
| Gu Z, 2019    | Alprostadil Injection      | CKI, 600mg, iv + Alprostadil Injection     | 21 days   | ALT, AST, T-BIL                     |
| Chen G, 2013  | Lamivudine                 | CKI, 20mL, iv + Lamivudine                 | 12 months | LN, HA, COL3                        |
| Xia W, 2012   | Compound glycyrrhizin      | CKI, 30mL, iv + Compound glycyrrhizin      | 8 weeks   | LN, HA, COL3, COL4                  |
| Liang G, 2004 | Thymosin injection         | CKI, 20mL, iv                              | 8 weeks   | HA, COL4                            |
| Chen X, 2014  | Hepatinica                 | CKI, 600mg, iv + Hepatinica                | 6 months  | LN, HA, COL3, COL4                  |

**Table S7 List of selected studies for meta-analysis**

1. Song J, Song S. Observation on the therapeutic effect of Entecavir combined with Compound kushen injection against chronic Hepatitis B. *Journal of Qiqihar Medical University*. 2019; 40(5):598-599. DOI: 10.3969/j.issn.1002-1256.2019.05.030
2. Chen R. Compound kushen injection combined with Arixin injection in the treatment of 30 patients with chronic Hepatitis B. *Journal of Practical Traditional Chinese Medicine*. 2004; 20(9):500.
3. Sun X, Wang H, Gong Y, Liu Q, Xiao L. Compound kusGhen injection and Interferon  $\alpha$ -1b in Treating 55 Cases of Chronic Hepatitis B. *Western Journal of Traditional Chinese Medicine*. 2018; 31(12):95-97.
4. Zhu B, Zhang P. Observation on therapeutic effect of Compound kushen injection combined with adefovir dipivoxil in the treatment for the chronic hepatitis B. *The Chinese Journal of Clinical Pharmacology*. 2014; 30(3):179-181. DOI: 10.13699/j.cnki.1001-6821.2014.03.005
5. Zhao W, Li Y, Ji J. The improvement effect of patient liver function with the chronic hepatitis B after Compound kushen injection combined with Entecavir. *Chinese Journal of Information on Traditional Chinese Medicine*. 2013; 20(3):70-71. DOI: 10.3969/j.issn.1005-5304.2013.03.027
6. Qiu Y, Sun H, Yu C. Compound kushen injection combined with Lamivudine in treating 70 cases of chronic hepatitis B. *Zhejiang Journal of Traditional Chinese Medicine*. 2011; 46(5):389.
7. Yan X, Dong L, Zhang L. Observation on Therapeutic Effect of Compound Kushen Injection Combined with Lamivadine in Treatment of Chronic Hepatitis B. *Research of Integrated Traditional Chinese and Western Medicine*. 2015; 7(1):7-9. DOI: 10.3969/j.issn.1674-4616.2015.01.002
8. Bao X, Yin G. On Effect of Matrine Injection in Treatment of Hepatitis B Cirrhosis and Its Mechanism. *Journal of Beihua University (Natural Science)*. 2014; 15(6):780-782. DOI: 10.11713/j.issn.1009-4822.2014.06.020
9. Guo L, Sun J, Wang G. Compound kushen injection combined with Interferon in treating 30 cases of chronic hepatitis C. *Modern Journal of Integrated Traditional*

- Chinese and Western Medicine. 2008; 17(36):5582.
10. Ma Y, Zhang L. The therapeutic effect of Compound kushen injection combined with Interferon against chronic hepatitis C. *Asia-Pacific Traditional Medicine*. 2015; 11(13):114-115. DOI: 10.11954/ytctyy.201513057.
  11. Gao C, Yang Y. Compound kushen injection combined with Bicyclol in treating 30 cases of chronic hepatitis C. *Shaanxi Medical Journal*. 2016; 45(9):1239-1241. DOI: 10.3969/j.issn.1000-7377.2016.09.066
  12. Chen Y, Lin J, Lou X, Yan H, Chen J. The Curing Effect of Complex Radix Sophorae Flavescentis Injection on Hepatitis Liver Cirrhosis. 2012; 12(5):53-55. DOI: 10.3969/j.issn.1671-332X.2012.5.021
  13. Chen M. Influence of Kushen injection on fibrosis index and interleukin in serum and ascites for patients with cirrhosis. *Journal of Hainan Medical University*. 2015; 21(4): 476-478. DOI: 10.13210/j.cnki.jhmu.20150104.006.
  14. Gu Z. The therapeutic effect of Compound kushen injection combined with Alteplase against hepatitis liver cirrhosis. 2019; 31(6):108-109.
  15. Chen G, Mao J, Jiao Z, Li Y. Efficacy Observation of Compound Sophora flavescens Injection Combined with Lamivudine on Chronic Hepatitis B Cirrhosis. *China Pharmacy*. 2013; 24(4): 342-344. DOI: 10.6039/j.issn.1001-0408.2013.04.19
  16. Xia W, Wang D, Xiao S, Shan J. Efficacy of Compound kushen Injection in Preventing Hepatic Fibrosis Formation in Patients with Chronic Hepatitis B. *Research of Integrated Traditional Chinese and Western Medicine*. 2012; 4(5): 229-230+233. DOI: 10.3969/j.issn.1674-4616.2012.05.002
  17. Liang G. Compound kushen injection in treating 30 cases of chronic hepatitis C induced liver fibrosis. *Guangxi Medical Journal*. 2004; 26(11):1628-1630.
  18. Chen X. Clinical efficacy of Compound Matrine injection in treatment of hepatitis C cirrhosis and its mechanism. *Drugs & Clinic*. 2014; 29(5):527-531. DOI: 10.7501/j.issn.1674-5515.2014.05.019

**Table S8 The *P* value of risk of publication bias**

| <b>Index</b> | <b><i>P</i> value</b> |
|--------------|-----------------------|
| ALT          | 0.622                 |
| AST          | 0.392                 |
| T-BIL        | 0.100                 |
| LN           | 0.039                 |
| HA           | 0.138                 |
| COL3         | 0.083                 |
| COL4         | 0.083                 |
